# Supplementary material
Source: HighWire-hosted journal article supplement (https://care.diabetesjournals.org/content/suppl/2007/12/06/dc07-1170)

## Females

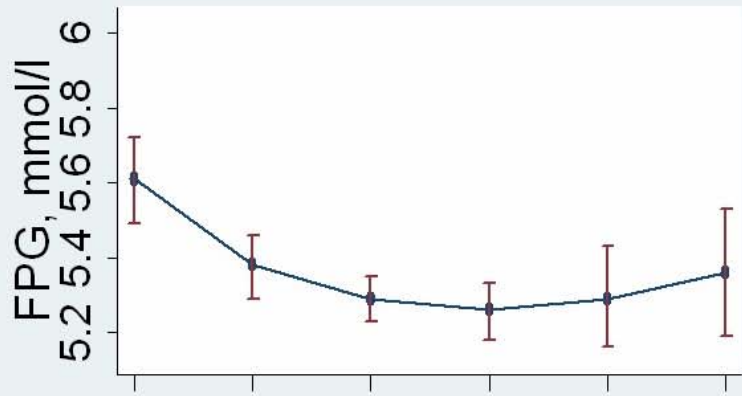

## Males

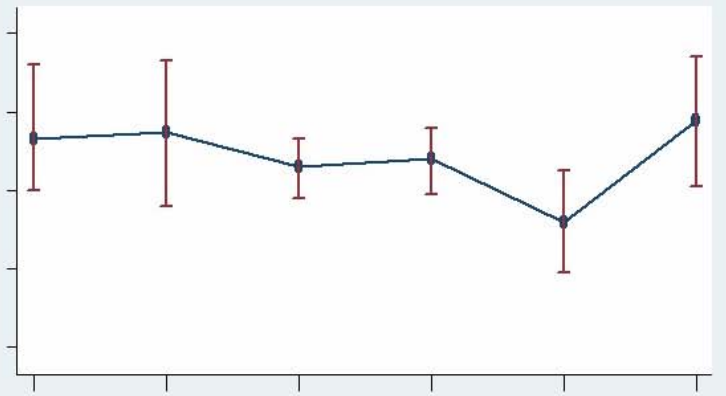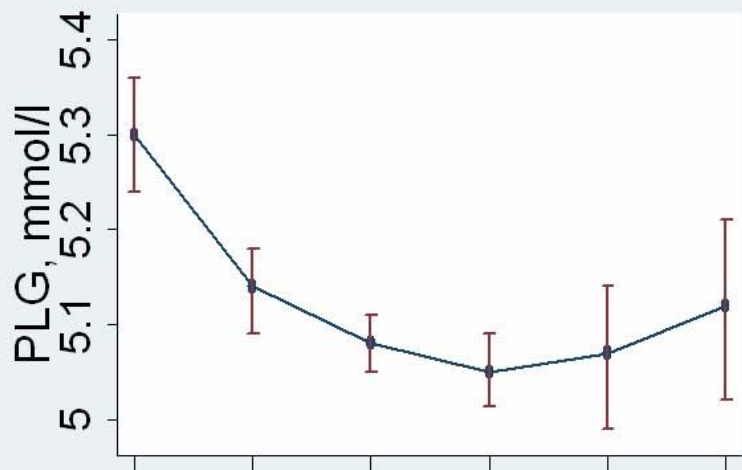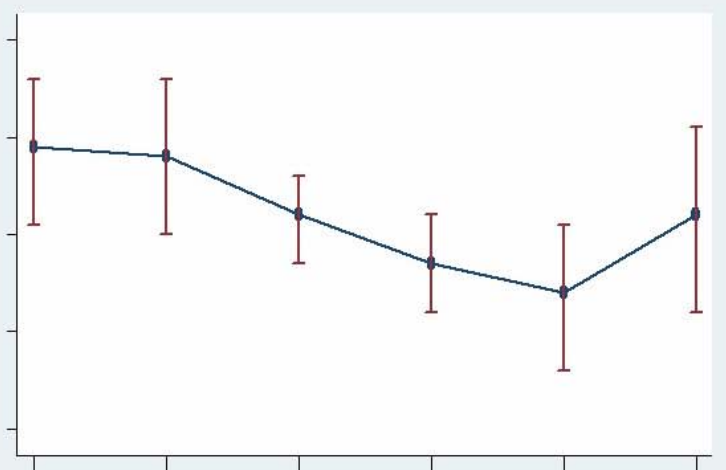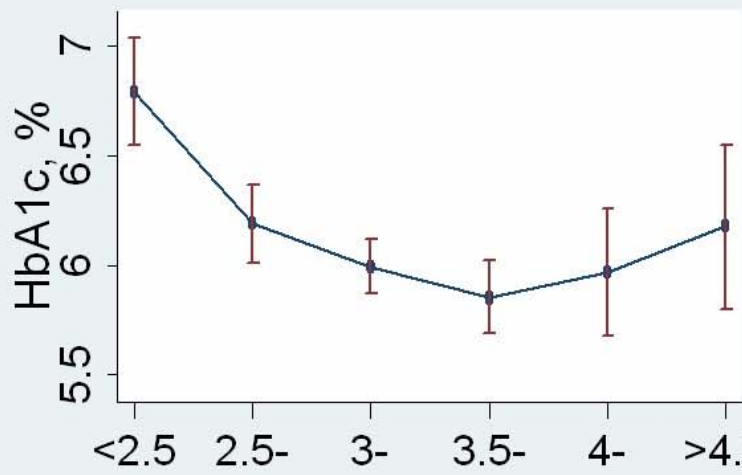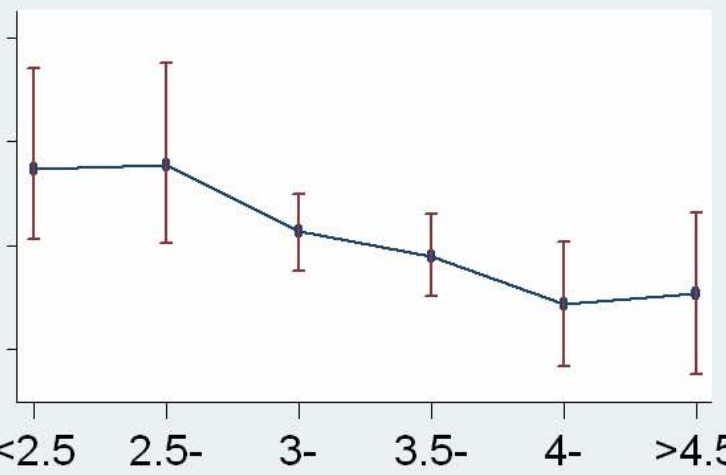

Birthweight, kg

Supplement: dc071170OnlineAppendixFigure.pdf [file dc071170OnlineAppendixFigure.pdf]
